# Supplementary material for: Antagonistic Roles of the Tumor Suppressor miR-210-3p and Oncomucin MUC4 Forming a Negative Feedback Loop in Pancreatic Adenocarcinoma
Source: MDPI journal article supplement (doi:10.3390/cancers13246197), 2021-12-09
Supplement: s1 [file s1]

**A**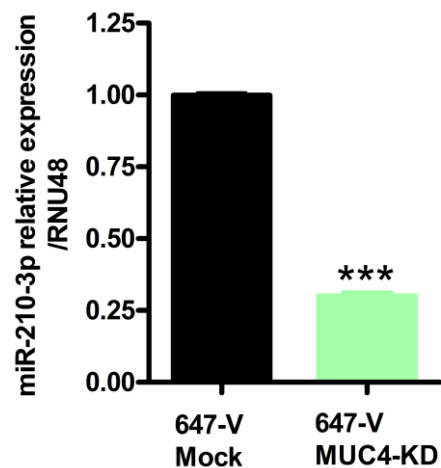**B**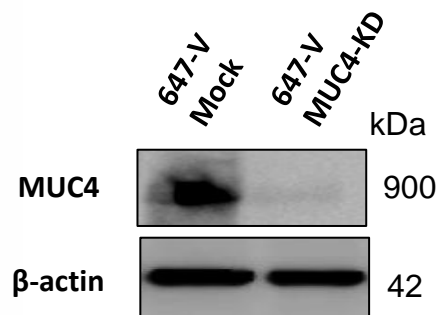

**Figure S1: MUC4 inhibition induced a decrease of miR-210-3p relative level in 647-V cells. (A)** qRT-PCR analysis of miR-210-3p relative expression was performed in mock and MUC4-KD 647-V cells. Expression of miR-210 was evaluated according to the  $2^{-\Delta Ct}$  method ( $\Delta\Delta Ct = (Ct \text{ miR-210} - Ct \text{ RNU48})$ ). **(B)** Western blotting analysis of MUC4 and  $\beta$ -actin expression in 647-V mock and MUC4-KD cells.

**A**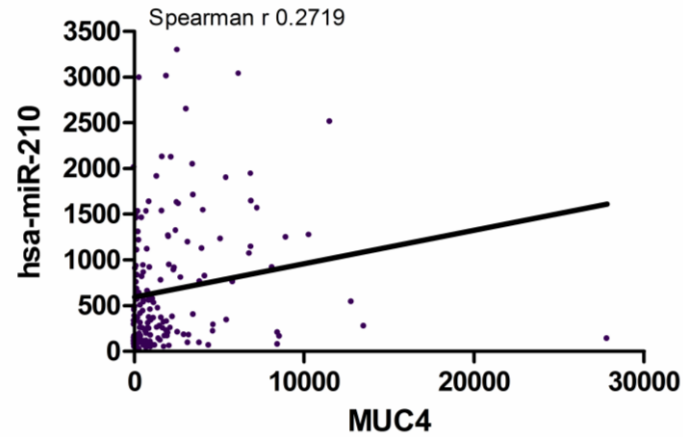

**Figure S2: MUC4 and miR-210 expression levels are correlated in TCGA-PAAD dataset.** MiR-210 (RPM) and MUC4 RNA (RSEM) relative expression levels were extracted using [www.linkedomics.org](http://www.linkedomics.org), where after Spearman correlation test were performed.

**A**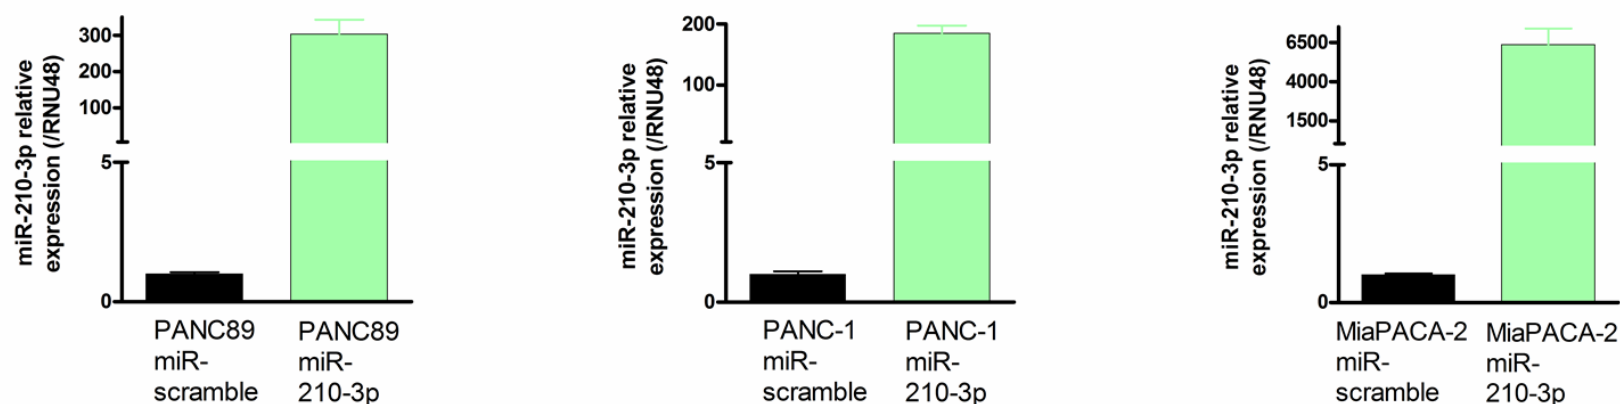**B**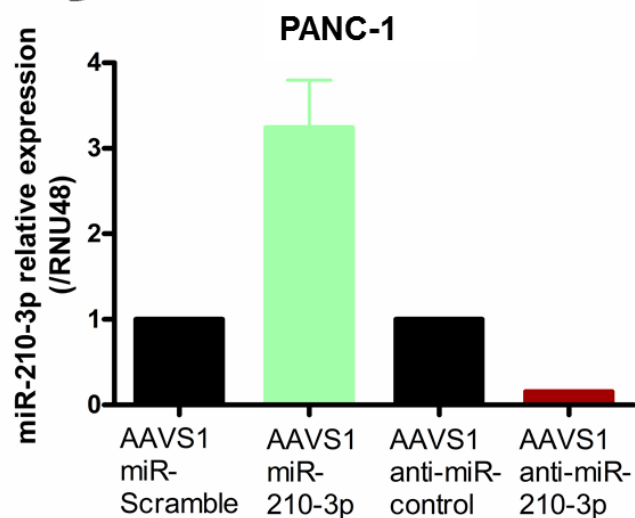

**Figure S3: Evaluation of miR-210 expression in transient and stable expression cell models.** qRT-PCR analysis of miR-210-3p relative expression in PANC89, PANC1 and MIA PaCa-2 pancreatic cancer cells 96 h post miR-210 transfection (A) and in PANC1 stably transfected with miR-210-3p, anti-miR-210-3p and miR-scramble, anti-miR-control (PANC-1/AAVS1) (B).

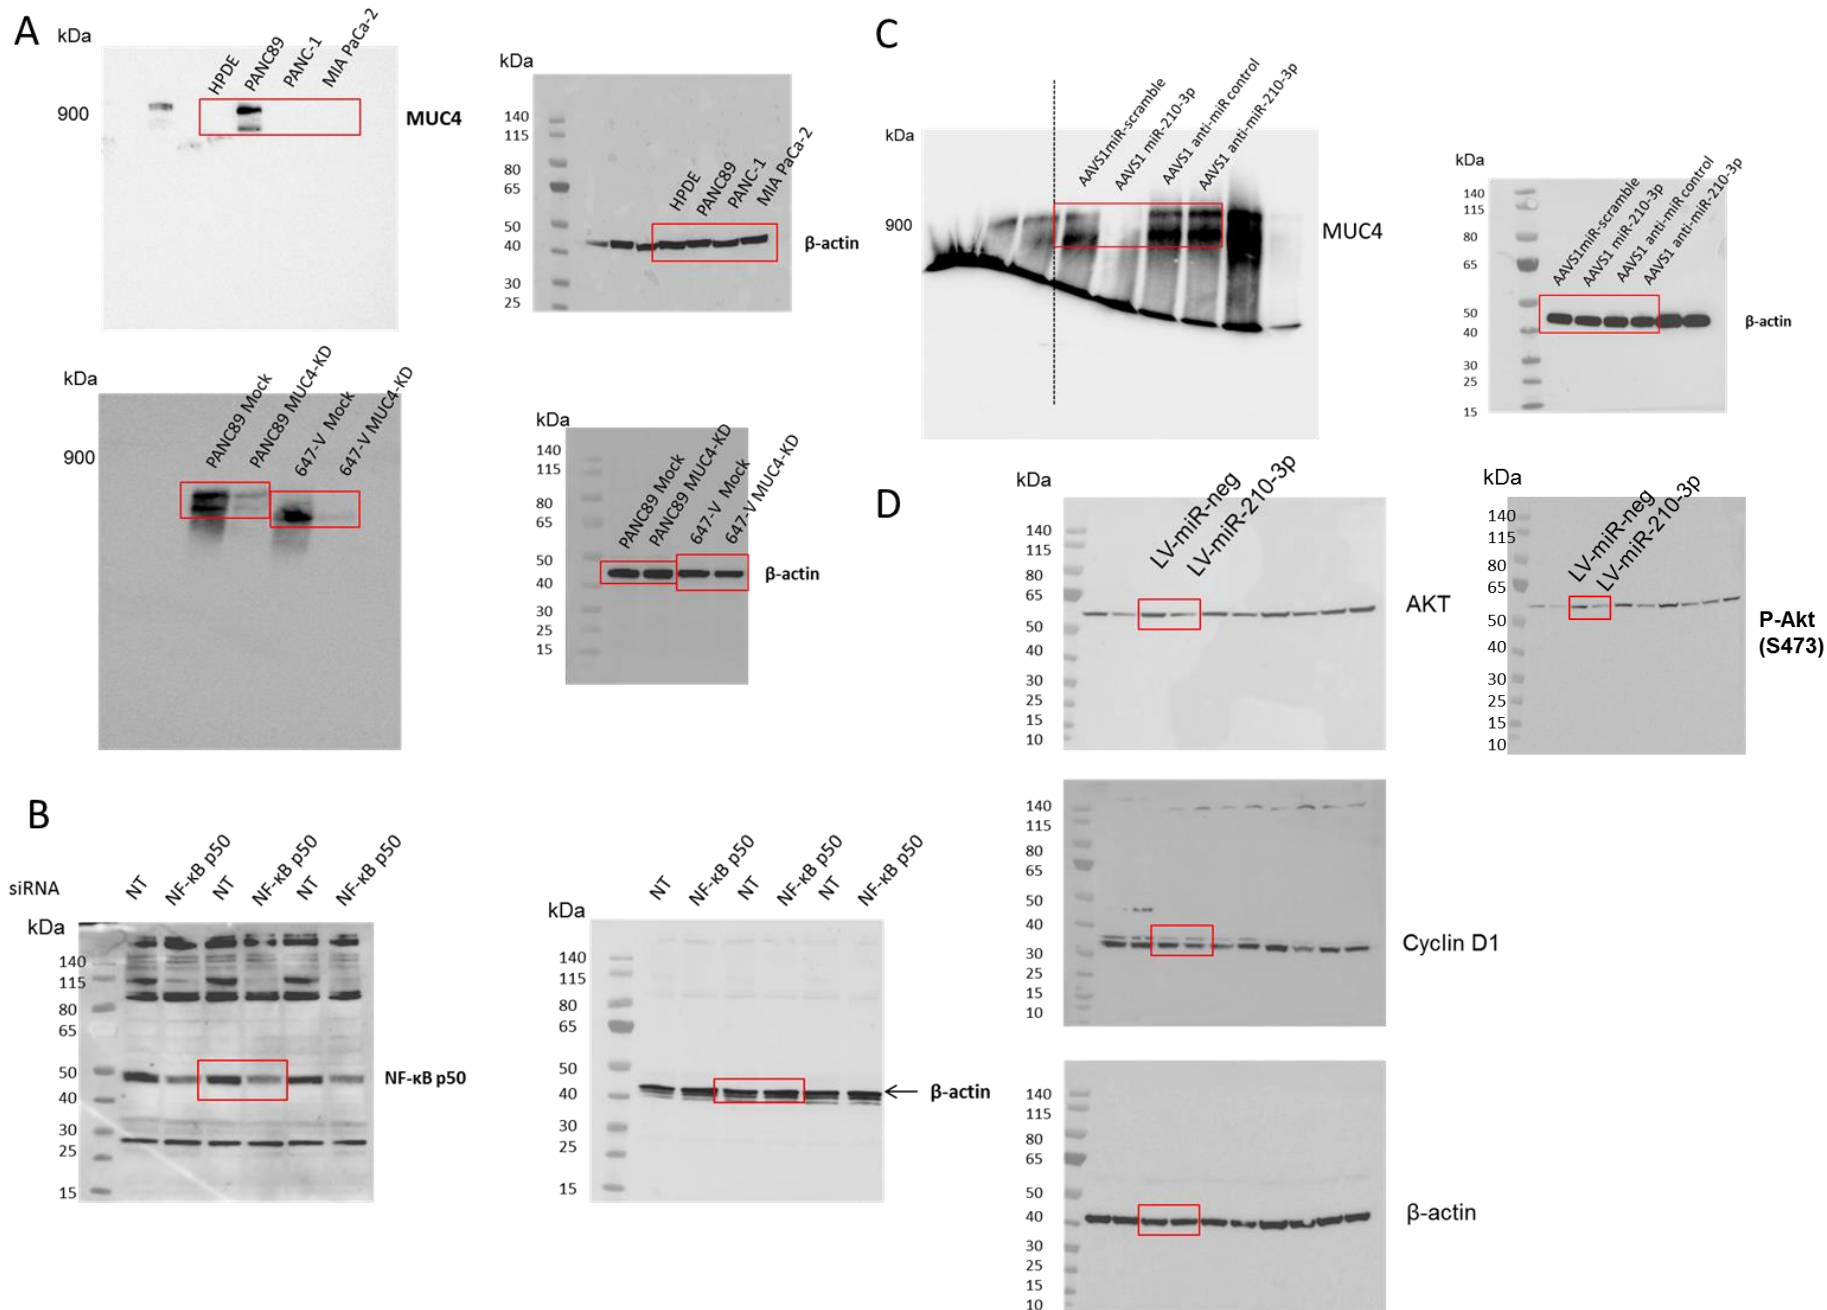

**Figure S4: Full pictures of Western blots.** (A) MUC4 and β-actin uncropped western blots from figure 1 and S1. (B) NF-κB p 50 and β-actin uncropped western blots from figure 3. (C) MUC4 and β-actin uncropped western blots from figure 4. (D) Akt, cyclinD1 and β-actin uncropped western blots from figure 7.
